# Supplementary material for: Small-molecule inhibition of siderophore biosynthesis in Mycobacterium tuberculosis and Yersinia pestis
Source: Springer Nature journal article supplement (doi:10.1038/nchembio706), 2005-05-24
Supplement: nchembio706-S3.pdf [file nchembio706-S3.pdf]

**Small Molecule Inhibition of Siderophore Biosynthesis in**  
***Mycobacterium tuberculosis* and *Yersinia pestis***

Julian A. Ferreras,<sup>1</sup> Jae-Sang Ryu,<sup>2</sup> Federico Di Lello,<sup>1</sup>

Derek S. Tan<sup>2,3,\*</sup>, and Luis E. N. Quadri<sup>1,\*</sup>

<sup>1</sup>Department of Microbiology and Immunology, Weill Medical College of Cornell University, 1300 York Ave., Box 62, New York, NY 10021, and <sup>2</sup>Molecular Pharmacology and Chemistry Program and <sup>3</sup>Tri-Institutional Research Program, Memorial Sloan–Kettering Cancer Center, 1275 York Ave., Box 422, New York, NY 10021

Correspondence and requests for materials should be addressed to L.E.N.Q. (e-mail: leq2001@med.cornell.edu) and D.S.T. (e-mail: tand@mskcc.org).

## Supplementary Methods

- I. Synthetic Materials and Methods
  - II. Synthesis of Salicyl-AMS (**2**) and AMS (**8**)
  - III. Protein Production
  - IV. Adenylation assay and data analysis
  - V. Domain salicylation assay
  - VI. References
- 

### I. Synthetic Materials and Methods

Reagents were obtained from Aldrich Chemical ([www.sigma-aldrich.com](http://www.sigma-aldrich.com)) or Acros Organics ([www.fishersci.com](http://www.fishersci.com)) and used without further purification. Optima grade solvents were obtained from Fisher Scientific ([www.fishersci.com](http://www.fishersci.com)), degassed with Ar, and purified on a solvent drying system as described elsewhere<sup>1</sup>. Reactions were performed in flame-dried glassware under positive Ar pressure with magnetic stirring. Cold baths were generated as follows: 0 °C, wet ice/water; -78 °C, dry ice/acetone. TLC was performed on 0.25 mm E. Merck silica gel 60 F254 plates and visualized under UV light (254 nm) or by staining with potassium permanganate (KMnO<sub>4</sub>) or cerium ammonium molybdenate (CAM). Flash chromatography was performed on E. Merck 230–400 mesh silica gel 60. NMR spectra were recorded on Bruker DRX500

or AMX400 instruments at 24 °C. Chemical shifts are expressed in ppm relative to TMS ( $^1\text{H}$ , 0 ppm),  $\text{CDCl}_3$  ( $^{13}\text{C}$ , 77.0 ppm), or  $\text{DMSO-d}_6$  ( $^1\text{H}$ , 2.50 ppm;  $^{13}\text{C}$ , 39.51 ppm); coupling constants are expressed in Hz. Mass spectra were obtained at the MSKCC Analytical Core Facility on a PE SCIEX API 100 mass spectrometer by electrospray (ESI) ionization.

## II. Synthesis of Salicyl-AMS (2) and AMS (8)

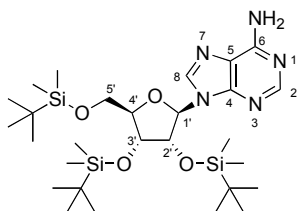

**2',3',4'-O,O,O,-Tris(*t*-butyldimethylsilyl)adenosine (9).** *tert*-Butyldimethylsilyl chloride (16.3 g, 105 mmol, 3.5 equiv) in anhyd DMF (20 mL) was added to a solution of (–)-adenosine **5** (8.09 g, 30 mmol) and imidazole (18.4 g, 270 mmol, 9.0 equiv) in anhyd DMF (40 mL). The white slurry turned to a colorless solution in 10 min. The resulting clear solution was stirred overnight. The reaction mixture was then diluted with  $\text{CH}_2\text{Cl}_2$ , washed with 3 × satd aq  $\text{NaHCO}_3$ , dried ( $\text{MgSO}_4$ ), filtered, and concentrated. The residue was purified by column chromatography. (elution with 3:1 hexane/EtOAc) to yield **9** as white solid (11.5 g, 63%).

**TLC:**  $R_f$  0.29 (1:1 hexanes/EtOAc).  **$^1\text{H-NMR}$**  (400 MHz,  $\text{CDCl}_3$ ):  $\delta$  8.33 (s, 1H), 8.15 (s, 1H), 6.02 (d, 1H,  $J = 5.2$ ), 4.69 (t, 1H,  $J = 4.9$ ), 4.32 (t, 1H,  $J = 3.8$ ), 4.12 (m, 1H), 4.03 (dd, 1H,  $J = 11.4, 4.4$ ), 3.79 (dd, 1H,  $J = 11.4, 2.8$ ), 0.95 (s, 9H), 0.93 (s, 9H), 0.79 (s, 9H), 0.13 (s, 3H), 0.12 (s, 3H), 0.10 (s, 3H), 0.09 (s, 3H),  $-0.04$  (s, 3H),  $-0.23$  (s, 3H).  **$^{13}\text{C-NMR}$**  (125 MHz,  $\text{CDCl}_3$ ):  $\delta$  155.7, 153.1, 150.1, 139.8, 120.3, 88.5, 85.7, 75.9, 72.2, 62.7, 26.3, 26.0, 25.6, 18.7, 18.3, 18.1,  $-4.2$ ,  $-4.5$ ,  $-4.5$ ,  $-4.9$ ,  $-5.2$ ,  $-5.2$ . **ESI-MS**  $m/z$ : (pos) 610.3  $[\text{M}+\text{H}]^+$ , 632.3  $[\text{M}+\text{Na}]^+$ ; (neg) 608.4  $[\text{M}-\text{H}]^-$ , 644.4  $[\text{M}+\text{Cl}]^-$ .

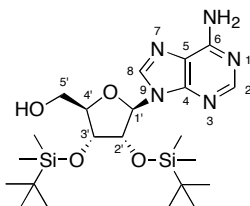

**2',3'-O,O-Bis(*t*-butyldimethylsilyl)adenosine (6).** A mixture of TFA (1.75 mL) and  $\text{H}_2\text{O}$  (1.75 mL) was added to a cooled ( $0\text{ }^\circ\text{C}$ ) solution of tris(TBS)adenosine **9** (350 mg, 574  $\mu\text{mol}$ ) in THF (7 mL). The reaction mixture was stirred at  $0\text{ }^\circ\text{C}$ . After 5 h, aq  $\text{NaHCO}_3$  was added at  $0\text{ }^\circ\text{C}$ . The aqueous layer was extracted 3  $\times$  with EtOAc, washed with  $\text{H}_2\text{O}$  and brine, dried ( $\text{MgSO}_4$ ), filtered, and concentrated. The residue was purified by flash chromatography (elution with 1:1 hexane/EtOAc) to afford **6** as a white solid (251.6 mg, 88%).

**TLC:**  $R_f$  0.22 (EtOAc), 0.37 (9:1 CH<sub>2</sub>Cl<sub>2</sub>/MeOH). **<sup>1</sup>H-NMR** (400 MHz, CDCl<sub>3</sub>):  $\delta$  8.35 (s, 1H), 7.83 (s, 1H), 6.71 (dd, 1H,  $J = 12.2, 1.8$ ), 5.78 (d, 1H,  $J = 7.9$ ), 5.56 (br s, 2H), 5.05 (dd, 1H,  $J = 7.9, 4.6$ ), 4.33 (d, 1H,  $J = 4.6$ ), 4.16 (s, 1H), 3.94 (d, 1H,  $J = 13.0$ ), 3.70 (t, 1H,  $J = 12.7$ ), 0.95 (s, 9H), 0.75 (s, 9H), 0.13 (s, 3H), 0.12 (s, 3H), -0.14 (s, 3H), -0.62 (s, 3H). **<sup>13</sup>C-NMR** (125 MHz, DMSO-*d*<sub>6</sub>):  $\delta$  156.2, 152.3, 148.9, 140.2, 119.5, 87.6, 87.1, 74.1, 73.0, 61.4, 48.6, 25.7, 25.4, 17.8, 17.5, -4.7, -4.8, -4.9, -5.8. **ESI-MS**  $m/z$ : (pos) 496.3 [M+H]<sup>+</sup>, 518.2 [M+Na]<sup>+</sup>; (neg) 530.2 [M+Cl]<sup>-</sup>.

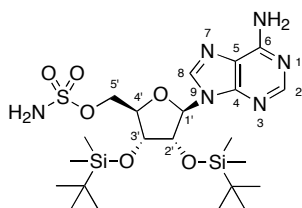

**2',3'-O,O-Bis(*t*-butyldimethylsilyl)-5'-O-sulfamoyl-adenosine (7).** Bis(tributyltin) oxide (7.43 mL, 14.0 mmol, 3.5 equiv) was added dropwise to a solution of bis(TBS)adenosine **6** (1.98 g, 4.0 mmol) in anhyd benzene (130 mL). The resulting white suspension was refluxed with stirring. After 2 h, the reaction mixture was cooled to 5 °C. Sulfamoyl chloride (2.08 g, 18.0 mmol, 4.5 equiv) in dioxane (65 mL) was added dropwise to the reaction mixture, stirred for an additional 30 min at 5 °C. The solvent was then removed *in vacuo*. The residue was rinsed 3 × with hot (40 °C) hexane. The solid was washed with 1 N NH<sub>3</sub> solution in MeOH. The crude material was purified by column chromatography (elution with 15:1 CH<sub>2</sub>Cl<sub>2</sub>/MeOH) to yield **7** as white solid (2.2 g, 96%)

**TLC:**  $R_f$  0.2 (9:1  $\text{CH}_2\text{Cl}_2/\text{MeOH}$ ).  **$^1\text{H-NMR}$**  (400 MHz,  $\text{DMSO-d}_6$ ):  $\delta$  8.36 (s, 1H), 8.16 (s, 1H), 7.66 (br s, 2H), 7.33 (br s, 2H), 5.95 (d, 1H,  $J = 6.6$ ), 4.97 (dd, 1H,  $J = 6.6$ , 4.3), 4.38-4.41 (m, 2H), 4.31 (dd, 1H,  $J = 10.8$ , 5.8), 4.18 (m, 1H), 0.93 (s, 9H), 0.71 (s, 9H), 0.15 (s, 3H), 0.12 (s, 3H),  $-0.09$  (s, 3H),  $-0.38$  (s, 3H).  **$^{13}\text{C-NMR}$**  (125 MHz,  $\text{DMSO-d}_6$ ):  $\delta$  156.1, 152.7, 149.4, 139.8, 119.3, 87.0, 82.8, 73.7, 72.4, 68.0, 25.7, 25.4, 17.7, 17.5,  $-4.7$ ,  $-4.8$ ,  $-4.9$ ,  $-5.6$ . **ESI-MS**  $m/z$ : (pos) 575.3  $[\text{M}+\text{H}]^+$ ; (neg) 573.2  $[\text{M}-\text{H}]^-$ , 609.2  $[\text{M}+\text{Cl}]^-$ .

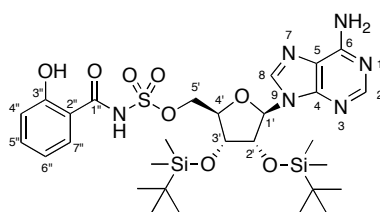

**2',3'-O,O-Bis(*t*-butyldimethylsilyl)-5'-O-(*N*-salicylsulfamoyl)adenosine (10).** A solution of salicylic acid (66 mg, 477  $\mu\text{mol}$ , 3.0 equiv) and 1,1'-carbonyldiimidazole (93 mg, 575  $\mu\text{mol}$ , 3.6 equiv) in anhyd acetonitrile (4 mL) was stirred at 60 °C for 2 h under argon atmosphere. The reaction mixture was cooled to rt. A mixture of bis(TBS)sulfamoyl adenosine **7** (92 mg, 160  $\mu\text{mol}$ ) and DBU (36  $\mu\text{L}$ , 241  $\mu\text{mol}$ , 1.5 equiv) was then added dropwise to the reaction mixture. The resulting yellow solution was again stirred at 60 °C. After an additional 30 min, the reaction mixture was diluted with  $\text{H}_2\text{O}$ . The aqueous layer was extracted 3  $\times$  with EtOAc, washed with 1 N HCl, satd

aq NaHCO<sub>3</sub>, and brine, dried (MgSO<sub>4</sub>), filtered, and concentrated. The residue was purified by flash column chromatography (elution with 9:1 CH<sub>2</sub>Cl<sub>2</sub>/MeOH → 5:1 CH<sub>2</sub>Cl<sub>2</sub>/MeOH) to afford **10** as a white solid (89 mg, 80%).

**TLC:** *R<sub>f</sub>* 0.21 (17:3 EtOAc/MeOH). **<sup>1</sup>H-NMR** (400 MHz, DMSO-d<sub>6</sub>): δ 8.45 (s, 1H), 8.09 (s, 1H), 7.84 (dd, 1H, *J* = 7.8, 1.8), 7.28 (br s, 2H), 7.26 (m, 1H), 6.76-6.71 (m, 2H), 5.95 (d, 1H, *J* = 7.3), 4.92 (dd, 1H, *J* = 4.3, 7.3), 4.36 (d, 1H, *J* = 4.3), 4.29 (dd, 1H, *J* = 4.8, 11), 4.23-4.16 (m, 2H), 0.9 (s, 9H), 0.65 (s, 9H), 0.1 (s, 3H), 0.09 (s, 3H), -0.12 (s, 3H), -0.46 (s, 3H). **<sup>13</sup>C-NMR** (125 MHz, DMSO-d<sub>6</sub>): δ 171.1, 160.7, 156.0, 152.6, 149.7, 139.4, 132.6, 129.9, 119.8, 118.9, 117.4, 116.5, 86.2, 83.9, 74.5, 73.2, 67.4, 25.7, 25.4, 17.7, 17.4, -4.8, -4.9, -5.8, -5.9. **ESI-MS** *m/z*: (pos) 695.3 [M+H]<sup>+</sup>, 717.2 [M+Na]<sup>+</sup>; (neg) 693.2 [M-H]<sup>-</sup>.

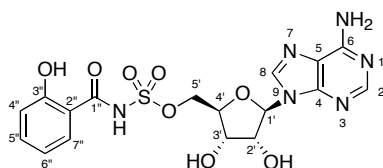

**5'-O-(N-Salicylsulfamoyl)adenosine (Salicyl-AMS, 2).** TBAF (1.0 M in THF, 100 μL, 0.1 mmol, 2.5 equiv) was added dropwise to a solution of bis(TBS)salicylsulfamoyl-adenosine **10** (28 mg, 0.04 mmol) in anhyd THF (1.6 mL). The reaction mixture was stirred at rt for 30 min. The solvent was then evaporated. The residue was

purified by flash column chromatography (elution with 5:1 EtOAc/MeOH) to afford **2** as a white solid (14.8 mg, 79%).

**TLC:**  $R_f$  0.33 (5:1 EtOAc/MeOH).  **$^1\text{H-NMR}$**  (400 MHz, DMSO- $d_6$ ):  $\delta$  8.40 (s, 1H), 8.12 (s, 1H), 7.81 (dd, 1H,  $J = 7.7, 1.4$ ), 7.28-7.24 (m, 3H), 6.75 (d, 1H,  $J = 7.7$ ), 6.74 (t, 1H,  $J = 7.7$ ), 5.92 (d, 1H,  $J = 6.4$ ), 5.49 (d, 1H,  $J = 6.1$ ), 5.35 (d, 1H,  $J = 4.8$ ), 4.62 (dd, 1H,  $J = 6.4, 5.8$ ), 4.25-4.08 (m, 4H).  **$^{13}\text{C-NMR}$**  (125 MHz, DMSO- $d_6$ ):  $\delta$  171.1, 160.7, 156.0, 152.6, 149.6, 139.3, 132.6, 129.9, 119.9, 118.9, 117.5, 116.6, 86.9, 82.5, 73.5, 70.8, 68.1. **ESI-MS**  $m/z$ : (pos) 467  $[\text{M}+\text{H}]^+$ , 489  $[\text{M}+\text{Na}]^+$ ; (neg) 465  $[\text{M}-\text{H}]^-$ .

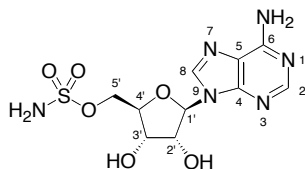

**5'-O-Sulfamoyladenine (AMS, **8**).** TBAF (1.0 M in THF, 250  $\mu\text{L}$ , 0.25 mmol, 2.5 equiv) was added dropwise to a solution of bis(TBS)sulfamoyladenine **7** (57.4 mg, 0.1 mmol) in anhyd THF (4.0 mL). The reaction mixture was stirred at rt for 30 min. The solvent was then evaporated. The residue was purified by column chromatography (elution with 5:1 EtOAc/MeOH) to afford **8** as a white solid (31 mg, 89%).

**TLC:**  $R_f$  0.18 (6:1 EtOAc/MeOH).  **$^1\text{H-NMR}$**  (500 MHz, DMSO- $d_6$ ):  $\delta$  8.30 (s, 1H), 8.15 (s, 1H), 7.60 (br s, 2H), 7.31 (br s, 2H), 5.93 (d, 1H,  $J = 5.3$ ), 5.62 (d, 1H,  $J = 6.0$ ),

5.44 (d, 1H,  $J = 5.4$ ), 4.63 (app q, 1H,  $J = 5.4$ ), 4.29 (dd, 1H,  $J = 10.7, 3.8$ ), 4.23 (app q, 1H,  $J = 4.9$ ), 4.19 (dd, 1H,  $J = 10.6, J = 6.0$ ), 4.14 (m, 1H).  $^{13}\text{C-NMR}$  (125 MHz, DMSO- $d_6$ ):  $\delta$  156.1, 152.7, 149.4, 139.4, 119.1, 87.5, 81.5, 73.0, 70.3, 68.7. **ESI-MS** m/z: (pos) 347.1  $[\text{M}+\text{H}]^+$ , 368.9  $[\text{M}+\text{Na}]^+$ ; (neg) 344.9  $[\text{M}-\text{H}]^-$ , 380.9  $[\text{M}+\text{Cl}]^-$ .

### III. Protein Production

MbtA and YbtE were expressed in *E. coli* BL21(DE3) as IPTG-inducible N-terminally His<sub>6</sub>Smt3-tagged proteins using plasmids pSmt3MbtA and pSmt3YbtE, respectively. Plasmid pSmt3MbtA was constructed by inserting the MbtA coding segment as a *Bam*HI–*Hind*III fragment into pSMT3<sup>2</sup>. The MbtA fragment was PCR amplified with primers JfmbtaF (5'-aaggaggatccatgccaccgaaggcggcag-3') and JfmbtaR (5'-ttgacaagcttcaatggcagcgcctgggtcg-3') from plasmid pMBTA<sup>3</sup>. Plasmid pSmt3YbtE was constructed by cloning the YbtE coding region as a *Bam*HI–*Hind*III fragment into pSMT3. This fragment was PCR amplified with primers JfybteF (5'-aaaggggatccatgaattcttcttgaatc-3') and JfybteR (5'-ggtttaagcttattgggcagaatggcgataac-3') from genomic DNA. Cloning was carried out using standard methods<sup>4</sup>. For protein production, the strains expressing the tagged proteins were cultivated in LB broth<sup>4</sup> (5 L) containing kanamycin (30  $\mu\text{g}/\text{ml}$ ) with orbital shaking (250 rpm) at 37 °C. Cultures ( $\text{OD}_{600} = 0.6$ ) were induced with 0.5 mM IPTG for 4 h before the cells were harvested and resuspended in lysis buffer (75 ml, 50 mM Tris·HCl pH 8, 0.5 M NaCl, 20% sucrose, 1 mM BME, 1 mM PMSF, 10 mM imidazole, 0.1% IGEPAL). Resuspended cells were disrupted using a French pressure cell and cellular debris was

removed from the lysates by ultracentrifugation. The tagged proteins were purified by nickel column chromatography using Ni-NTA Superflow resin according to the manufacturer's instructions (Qiagen). Purified proteins were dialyzed against a solution of 0.2 M NaCl, 25 mM Tris-HCl (pH 8.0), 2 mM DTT, and 5% glycerol. Tagged MbtA and YbtE were treated with SUMO protease (Invitrogen) to remove the tag as reported<sup>5</sup>. Tag-free MbtA and YbtE were purified by gel filtration using Superdex 200 resin according to the manufacturer's instructions (Amersham Biosciences). Protein samples were concentrated ( $\leq 10$  mg/ml) and stored at  $-80$  °C. Recombinant C-terminally His<sub>6</sub>-tagged PchD (PchD-H6), C-terminally His<sub>6</sub>-tagged *Y. pestis* ArCP domain (ypArCP-H6), and phosphopantetheinyl transferase Sfp were purified as reported<sup>6-8</sup>.

#### IV. Adenylation assay and data analysis

Adenylation was measured with an ATP-[<sup>32</sup>P]-pyrophosphate (PPi) exchange assay as reported<sup>3,6,8</sup>. Reactions (100  $\mu$ l) were initiated by addition of the domain salicylation enzyme. Exchange reactions used to obtain dose-response curves (**Figs. 2a–c**) each contained: 75 mM Tris-HCl (pH 8.8); 10 mM MgCl<sub>2</sub>; 2 mM DTT; 5% glycerol; 1 mM sodium [<sup>32</sup>P]-PPi (5 Ci/mol, PerkinElmer); 10 mM ATP ( $\approx 60 \times K_m^{\text{ATP}}$ ); 250, 500, and 140  $\mu$ M salicylate ( $\approx 50 \times K_m^{\text{Sal}}$ ) in reactions with MbtA, YbtE, and PchD, respectively; 20 nM domain salicylation enzyme; and inhibitor added in DMSO (1% of reaction volume) at the concentrations indicated. Reactions were incubated at 37 °C for 30 min for MbtA and for 15 min for YbtE and PchD. Data analysis was done using

methods for TBIs as described<sup>9</sup>. The dose-response data sets were fitted to the

$$\text{Morrison equation, } \frac{v_i}{v_c} = 1 - \frac{([E] + [I] + K_i^{\text{app}}) - \sqrt{([E] + [I] + K_i^{\text{app}})^2 - 4[E][I]}}{2[E]}, \text{ Eq. (1),}$$

where  $v_i$  and  $v_c$  are the activities measured in inhibitor-containing reactions and DMSO-containing (1%) controls, respectively.  $IC_{50}$  values were calculated with the equation

$$IC_{50} = \frac{1}{2}[E] + K_i^{\text{app}}, \text{ Eq. (2), and using the } K_i^{\text{app}} \text{ derived from the Eq (1) curve fit. In}$$

experiments to determine  $IC_{50}$  values at different YbtE concentrations (**Fig. 2d**), each

reaction had the composition noted above except that ATP and salicylate were both at 1

mM, the inhibitor was included in a 0–200 nM range, and YbtE was added at the

concentrations indicated. Reactions were incubated at 37 °C for 15 min. The dose-

response data were fitted to Eq. (1) and the  $IC_{50}$  values were calculated with Eq. (2).

In the experiments to determine  $K_i^{\text{app}}$  values (**Figs. 2e and f**), dose-response curves were

determined with the inhibitor in a 0–150 nM range, YbtE at 20 nM, and either ATP

fixed at 10 mM and salicylate at 1.3, 2.6, 5.2, 10.4, 20.8, 50, and 250  $\mu\text{M}$ , or salicylate

fixed at 1 mM and ATP at 0.04, 0.08, 0.16, 0.32, 0.64, 1.5, and 10 mM. [YbtE  $K_m^{\text{ATP}}$

= 172  $\mu\text{M}$  as determined in this study (not shown) and 350  $\mu\text{M}$  as reported elsewhere<sup>8</sup>;

YbtE  $K_m^{\text{Sal}}$  = 5.4  $\mu\text{M}$  as determined in this study (not shown) and 4.6  $\mu\text{M}$  as reported

elsewhere<sup>8</sup>]. Other components were included as indicated above. Dose-response

data sets were fitted to Eq. (1) to obtain a  $K_i^{\text{app}}$  for each dose-response curve. For

competitive TBIs,  $K_i^{\text{app}} = K_i(1 + \frac{[S]}{K_m})$ , thus  $K_i^{\text{app}} = K_i$  when  $[S] = 0$ , and the  $K_i$  value

was calculated as the  $y$ -intercept of the line fitted to the data<sup>9</sup> (**Fig. 2e**). For non-

competitive inhibition  $K_i^{\text{app}} = K_i$ , and the  $K_i$  was calculated by averaging the  $K_i^{\text{app}}$  values<sup>9</sup> (**Fig. 2f**). All data sets were fitted using Kaleidagraph<sup>TM</sup> software.

## V. Domain salicylation assay

The assay was performed in 96-well Nickel Chelate Coated FlashPlate<sup>®</sup> PLUS plates (flash plates) (PerkinElmer). Plate wells have a scintillant coat and a Ni<sup>2+</sup> coat for His<sub>6</sub>-tagged protein binding. YbtE-catalyzed incorporation of the [<sup>3</sup>H]-salicyl group into well-bound phosphopantetheinylated ypArCP-H6 leads to [<sup>3</sup>H]-salicyl-ypArCP-H6 formation, which is quantified with a plate counter. To obtain phosphopantetheinylated domain, ypArCP-H6 was co-expressed with Sfp (expressed from plasmid pSU20-Sfp<sup>10</sup>), and the purified ypArCP-H6 domain was further incubated with Sfp and coenzyme A for maximum modification as reported<sup>11</sup>. Domain binding to wells was done as recommended by the plate manufacturer. After binding, wells were loaded with reaction mixtures (30  $\mu$ l) containing 75 mM MES (pH 6.5), 1 mM TCEP, 100  $\mu$ M ATP, 150 nM [<sup>3</sup>H]-salicylate (33 Ci/mmol, Vitrox Inc.), and inhibitor (added in DMSO as 1% of the reaction volume) at the concentrations indicated (**Fig. 2g**). Reactions were started by addition of YbtE (20  $\mu$ l) at 70 nM. After incubation at 37 °C for 1.5 h, reactions were chased with 300  $\mu$ l of PBS containing 1 mM salicylate, the wells were washed with chase solution (3  $\times$  100  $\mu$ l), and [<sup>3</sup>H]-salicyl-ypArCP-H6 was quantified using a TopCount<sup>®</sup> Microplate counter (Packard BioScience). Dose-response data were fitted to Eq. (1) and the IC<sub>50</sub> was calculated with Eq. (2).

## VI. References

1. Pangborn, A. B., Giardello, M. A., Grubbs, R. H., Rosen, R. K. & Timmers, F. J. Safe and convenient procedure for solvent purification. *Organometallics* **15**, 1518–1520 (1996).
2. Mossessova, E. & Lima, C. D. Ulp1-SUMO crystal structure and genetic analysis reveal conserved interactions and a regulatory element essential for cell growth in yeast. *Mol. Cell* **5**, 865-876. (2000).
3. Quadri, L. E. N., Sello, J., Keating, T. A., Weinreb, P. H. & Walsh, C. T. Identification of a *Mycobacterium tuberculosis* gene cluster encoding the biosynthetic enzymes for assembly of the virulence-conferring siderophore mycobactin. *Chem. Biol.* **5**, 631-645. (1998).
4. Sambrook, J., Fritsch, E. F. & Maniatis, T. *Molecular cloning. A laboratory manual*. New York Cold Spring Harbor Laboratory (Cold Spring Harbor, NY., 1989).
5. Onwueme, K. C., Ferrerias, J. A., Buglino, J., Lima, C. D. & Quadri, L. E. Mycobacterial polyketide-associated proteins are acyltransferases: proof of principle with *Mycobacterium tuberculosis* PapA5. *Proc. Natl. Acad. Sci. U. S. A.* **101**, 4608-4613 (2004).
6. Quadri, L. E. N., Keating, T. A., Patel, H. M. & Walsh, C. T. Assembly of the *Pseudomonas aeruginosa* nonribosomal peptide siderophore pyochelin: *In vitro* reconstitution of aryl-4, 2-bisthiazoline synthetase activity from PchD, PchE, and PchF. *Biochemistry* **38**, 14941-14954. (1999).

7. Quadri, L. E. N. et al. Characterization of Sfp, a *Bacillus subtilis* phosphopantetheinyl transferase for peptidyl carrier protein domains in peptide synthetases. *Biochemistry* **37**, 1585-1595. (1998).
8. Gehring, A. M., Mori, I. I., Perry, R. D. & Walsh, C. T. The nonribosomal peptide synthetase HMWP2 forms a thiazoline ring during biogenesis of yersiniabactin, an iron-chelating virulence factor of *Yersinia pestis*. *Biochemistry* **37**, 11637-11650. (1998).
9. Copeland, R. A. in *Enzymes: A practical introduction to structure, mechanism, and data analysis* 305-317 (Wiley-VCH, Inc. Publications, New York, 2000).
10. Couch, R., O'Connor, S. E., Seidle, H., Walsh, C. T. & Parry, R. Characterization of CmaA, an adenylation-thiolation didomain enzyme involved in the biosynthesis of coronatine. *J. Bacteriol.* **186**, 35-42. (2004).
11. Weinreb, P. H., Quadri, L. E., Walsh, C. T. & Zuber, P. Stoichiometry and specificity of *in vitro* phosphopantetheinylation and aminoacylation of the valine-activating module of surfactin synthetase. *Biochemistry* **37**, 1575-1584. (1998).
